# Supplementary material for: Breast Cancer Population Attributable Risk Proportions Associated with Body Mass Index and Breast Density by Race/Ethnicity and Menopausal Status
Source: Oxford University Press journal article supplement (doi:10.1158/1055-9965.epi-20-0358), 2020-07-29
Supplement: 10559965epi200358-sup-238815_3_supp_6418202_qd9yq1.xlsx [file 10559965epi200358-sup-238815_3_supp_6418202_qd9yq1.xlsx]

## Sheet: Supplementary Table 2 6m follow
	Supplementary Table 2. Sensitivity analysis of hazard ratios (95% confidence intervals) of invasive breast cancer associated with body mass index and BI-RADS breast density stratified by race/ethnicity and menopausal status with follow-up starting at 6 months.a
	Risk factor	White	Black	Asian	Hispanic
	Premenopausal
	Body Mass Index (kg/m2)
	Underweight (<18.5)	0.95 (0.81, 1.11)	1.55 (0.55, 4.34)	1.02 (0.73, 1.42)	0.68 (0.29, 1.61)
	Normal (18.5-24.9)	1 (referent)	1 (referent)	1 (referent)	1 (referent)
	Overweight (25.0-29.9)	1.10 (1.04, 1.15)	1.00 (0.75, 1.33)	1.10 (0.93, 1.29)	0.82 (0.69, 0.98)
	Obese I (30.0-34.9)	1.10 (1.03, 1.18)	1.25 (0.92, 1.69)	1.22 (0.87, 1.71)	0.96 (0.77, 1.19)
	Obese II/III (≥35.0)	1.18 (1.08, 1.28)	1.12 (0.80, 1.57)	1.64 (0.96, 2.81)	1.08 (0.83, 1.41)
	BI-RADS Breast Density
	Almost entirely fat	0.45 (0.38, 0.53)	0.60 (0.36, 1.00)	0.57 (0.24, 1.32)	0.34 (0.20, 0.60)
	Scattered fibroglandular densities	1 (referent)	1 (referent)	1 (referent)	1 (referent)
	Heterogeneously dense	1.65 (1.57, 1.74)	1.50 (1.19, 1.89)	1.53 (1.24, 1.90)	1.78 (1.49, 2.11)
	Extremely dense	2.07 (1.93, 2.22)	2.01 (1.42, 2.84)	1.82 (1.44, 2.29)	2.39 (1.89, 3.00)
	Postmenopausal
	Body Mass Index (kg/m2)
	Underweight (<18.5)	0.76 (0.66, 0.86)	0.40 (0.17, 0.92)	0.66 (0.47, 0.92)	0.61 (0.31, 1.21)
	Normal (18.5-24.9)	1 (referent)	1 (referent)	1 (referent)	1 (referent)
	Overweight (25.0-29.9)	1.25 (1.21, 1.29)	1.25 (1.05, 1.48)	1.43 (1.28, 1.61)	1.16 (1.02, 1.32)
	Obese I (30.0-34.9)	1.40 (1.34, 1.45)	1.54 (1.29, 1.83)	1.56 (1.27, 1.92)	1.33 (1.15, 1.54)
	Obese II/III (≥35.0)	1.42 (1.36, 1.49)	1.79 (1.49, 2.14)	2.31 (1.68, 3.19)	1.41 (1.16, 1.71)
	BI-RADS Breast Density
	Almost entirely fat	0.56 (0.53, 0.59)	0.64 (0.52, 0.79)	0.59 (0.46, 0.75)	0.52 (0.44, 0.62)
	Scattered fibroglandular densities	1 (referent)	1 (referent)	1 (referent)	1 (referent)
	Heterogeneously dense	1.40 (1.36, 1.44)	1.58 (1.41, 1.78)	1.25 (1.11, 1.41)	1.37 (1.22, 1.54)
	Extremely dense	1.64 (1.55, 1.74)	1.64 (1.19, 2.26)	1.51 (1.26, 1.81)	2.12 (1.71, 2.61)
	a All models adjust for age, BMI, and BI-RADS breast density.
	Abbreviations: kg, kilograms; m, meters; BI-RADS, Breast Imaging Reporting and Data System.
