# Supplementary material for: Breast Cancer Population Attributable Risk Proportions Associated with Body Mass Index and Breast Density by Race/Ethnicity and Menopausal Status
Source: Oxford University Press journal article supplement (doi:10.1158/1055-9965.epi-20-0358), 2020-07-29
Supplement: 10559965epi200358-sup-238815_3_supp_6418203_qd9yq1.xlsx [file 10559965epi200358-sup-238815_3_supp_6418203_qd9yq1.xlsx]

## Sheet: Supplementary Table 3 Asian BMI
	Supplementary Table 3. Sensitivity analysis comparing hazard ratios (95% confidence intervals), distribution of body mass index (BMI), and population attributable risk proportions (PARPs) for BMI associated with invasive breast cancer, stratified by menopausal status, among Asian women using different BMI cutoffs.a
		Number of Women N (%)				Hazard ratios (95% confidence intervals)		Population Attributatble Risk Proportions (95% confidence intervals)
	Risk factor	Standard BMI Cutoffsb		Lower BMI Cutoffsc		Standard BMI Cutoffsb	Lower BMI Cutoffsc	Standard BMI Cutoffsb	Lower BMI Cutoffsc
	Premenopausal BMI (kg/m²)							3.3 (-5.1, 11.7)	4.7 (-6.7, 16.0)
	Underweight	2044.13	0.0397603	2044.13	0.0397603	0.97 (0.69, 1.36)	0.98 (0.70, 1.38)
	Normal	34326.4	0.66768	23390.5	0.454967	1 (referent)	1 (referent)
	Overweight	11306.5	0.219921	18742.3	0.364554	1.07 (0.91, 1.25)	1.07 (0.93, 1.24)
	Obese I	2776.04	0.0539966	6276.15	0.122077	1.24 (0.89, 1.73)	1.10 (0.87, 1.39)
	Obese II/III	958.412	0.018642	958.412	0.018642	1.62 (0.96, 2.73)	1.63 (0.96, 2.76)
	Postmenopausal BMI (kg/m²)							14.7 (8.1, 21.2)	18.7 (10.0, 27.0)
	Underweight	2589.14	0.03928	2589.14	0.03928	0.67 (0.48, 0.94)	0.70 (0.50, 0.98)
	Normal	40343.3	0.612052	25537.1	0.387425	1 (referent)	1 (referent)
	Overweight	17732.3	0.269018	27076.6	0.410781	1.45 (1.29, 1.63)	1.27 (1.12, 1.43)
	Obese I	3929	0.0596071	9390.96	0.142471	1.51 (1.23, 1.85)	1.65 (1.41, 1.92)
	Obese II/III	1321.12	0.0200429	1321.12	0.0200429	2.22 (1.61, 3.06)	2.33 (1.68, 3.23)
	a All models adjust for age, BMI, and BI-RADS breast density. All frequencies are inversely weighted by the number of observations per woman and calculations are described in the Methods.
	b Standard BMI cutoffs: Underweight (<18.5), Normal (18.5-24.9), Overweight (25.0-29.9), Obese I (30.0-34.9), Obese II/III (≥35.0)
	c Lower BMI cutoffs: Underweight (<18.5), Normal (18.5-23.0), Overweight (23.0-27.5), Obese I (27.5-34.9), Obese II/III (≥35.0)
	Abbreviations: BMI, body mass index; PARP, population attributable risk proportion; kg, kilograms; m, meters;
