# Supplementary material for: Breast Cancer Population Attributable Risk Proportions Associated with Body Mass Index and Breast Density by Race/Ethnicity and Menopausal Status
Source: Oxford University Press journal article supplement (doi:10.1158/1055-9965.epi-20-0358), 2020-07-29
Supplement: 10559965epi200358-sup-238815_3_supp_6418204_qd9yq1.xlsx [file 10559965epi200358-sup-238815_3_supp_6418204_qd9yq1.xlsx]

## Sheet: Supplementary Table 4 Confound
	Supplementary Table 4a. Sensitivity analysis of hazard ratios (95% confidence intervals) of invasive breast cancer associated with body mass index and BI-RADS breast density stratified by race/ethnicity and menopausal status and additional adjustment for age at first live birth.a						Supplementary Table 4b. Sensitivity analysis of hazard ratios (95% confidence intervals) of invasive breast cancer associated with body mass index and BI-RADS breast density stratified by race/ethnicity and menopausal status and additional adjustment for history of prior biopsy.a						Supplementary Table 4c. Sensitivity analysis of hazard ratios (95% confidence intervals) of invasive breast cancer associated with body mass index and BI-RADS breast density stratified by race/ethnicity and menopausal status and additional adjustment for use of hormone replacement therapy.a						Supplementary Table 4d. Sensitivity analysis of hazard ratios (95% confidence intervals) of invasive breast cancer associated with body mass index and BI-RADS breast density stratified by race/ethnicity and menopausal status and additional adjustment for first degree family history of breast cancer.a						Supplementary Table 4e. Sensitivity analysis of hazard ratios (95% confidence intervals) of invasive breast cancer associated with body mass index and BI-RADS breast density stratified by race/ethnicity and menopausal status and additional adjustment for age at first live birth, history of prior biopsy, use of hormone replacement therapy, and first degree family history of breast cancer.a
	Risk factor	White	Black	Asian	Hispanic		Risk factor	White	Black	Asian	Hispanic		Risk factor	White	Black	Asian	Hispanic		Risk factor	White	Black	Asian	Hispanic		Risk factor	White	Black	Asian	Hispanic
	Premenopausal						Premenopausal						Premenopausal						Premenopausal						Premenopausal
	Body Mass Index (kg/m2)						Body Mass Index (kg/m2)						Body Mass Index (kg/m2)						Body Mass Index (kg/m2)						Body Mass Index (kg/m2)
	Underweight (<18.5)	0.95 (0.81, 1.11)	1.52 (0.54, 4.25)	0.95 (0.68, 1.33)	0.63 (0.27, 1.49)		Underweight (<18.5)	0.95 (0.81, 1.11)	1.60 (0.56, 4.54)	0.96 (0.69, 1.35)	0.64 (0.27, 1.53)		Underweight (<18.5)	0.95 (0.81, 1.11)	1.52 (0.54, 4.24)	0.97 (0.69, 1.36)	0.66 (0.28, 1.56)		Underweight (<18.5)	0.94 (0.81, 1.11)	1.50 (0.54, 4.18)	0.97 (0.69, 1.36)	0.66 (0.28, 1.55)		Underweight (<18.5)	0.95 (0.81, 1.11)	1.58 (0.56, 4.48)	0.95 (0.68, 1.33)	0.62 (0.26, 1.46)
	Normal (18.5-24.9)	1 (referent)	1 (referent)	1 (referent)	1 (referent)		Normal (18.5-24.9)	1 (referent)	1 (referent)	1 (referent)	1 (referent)		Normal (18.5-24.9)	1 (referent)	1 (referent)	1 (referent)	1 (referent)		Normal (18.5-24.9)	1 (referent)	1 (referent)	1 (referent)	1 (referent)		Normal (18.5-24.9)	1 (referent)	1 (referent)	1 (referent)	1 (referent)
	Overweight (25.0-29.9)	1.11 (1.05, 1.17)	1.05 (0.79, 1.40)	1.07 (0.91, 1.26)	0.86 (0.72, 1.02)		Overweight (25.0-29.9)	1.10 (1.05, 1.16)	1.08 (0.81, 1.45)	1.06 (0.91, 1.25)	0.83 (0.70, 0.98)		Overweight (25.0-29.9)	1.10 (1.04, 1.16)	1.05 (0.79, 1.39)	1.07 (0.91, 1.25)	0.82 (0.69, 0.98)		Overweight (25.0-29.9)	1.10 (1.04, 1.16)	1.05 (0.79, 1.39)	1.06 (0.90, 1.24)	0.83 (0.70, 0.98)		Overweight (25.0-29.9)	1.11 (1.06, 1.17)	1.08 (0.81, 1.44)	1.06 (0.91, 1.25)	0.86 (0.73, 1.03)
	Obese I (30.0-34.9)	1.12 (1.04, 1.20)	1.26 (0.93, 1.71)	1.23 (0.89, 1.72)	1.00 (0.80, 1.24)		Obese I (30.0-34.9)	1.11 (1.04, 1.19)	1.28 (0.94, 1.73)	1.24 (0.89, 1.73)	0.95 (0.77, 1.18)		Obese I (30.0-34.9)	1.10 (1.03, 1.18)	1.26 (0.93, 1.70)	1.24 (0.89, 1.73)	0.95 (0.77, 1.18)		Obese I (30.0-34.9)	1.10 (1.03, 1.18)	1.26 (0.93, 1.70)	1.21 (0.87, 1.69)	0.95 (0.77, 1.18)		Obese I (30.0-34.9)	1.12 (1.05, 1.20)	1.28 (0.94, 1.74)	1.21 (0.87, 1.68)	1.00 (0.81, 1.24)
	Obese II/III (≥35.0)	1.20 (1.10, 1.30)	1.15 (0.82, 1.61)	1.60 (0.95, 2.71)	1.16 (0.89, 1.51)		Obese II/III (≥35.0)	1.19 (1.09, 1.29)	1.17 (0.84, 1.65)	1.60 (0.94, 2.70)	1.12 (0.86, 1.45)		Obese II/III (≥35.0)	1.18 (1.09, 1.28)	1.14 (0.82, 1.60)	1.61 (0.96, 2.73)	1.11 (0.86, 1.44)		Obese II/III (≥35.0)	1.17 (1.08, 1.27)	1.14 (0.82, 1.60)	1.59 (0.94, 2.69)	1.11 (0.86, 1.44)		Obese II/III (≥35.0)	1.20 (1.10, 1.30)	1.17 (0.83, 1.64)	1.56 (0.92, 2.64)	1.16 (0.90, 1.51)
	BI-RADS Breast Density						BI-RADS Breast Density						BI-RADS Breast Density						BI-RADS Breast Density						BI-RADS Breast Density
	Almost entirely fat	0.45 (0.38, 0.53)	0.58 (0.35, 0.96)	0.54 (0.23, 1.25)	0.33 (0.19, 0.58)		Almost entirely fat	0.46 (0.39, 0.54)	0.62 (0.37, 1.02)	0.57 (0.25, 1.33)	0.34 (0.20, 0.60)		Almost entirely fat	0.45 (0.38, 0.53)	0.58 (0.35, 0.96)	0.55 (0.24, 1.28)	0.34 (0.19, 0.59)		Almost entirely fat	0.45 (0.38, 0.53)	0.59 (0.36, 0.97)	0.55 (0.23, 1.27)	0.34 (0.19, 0.59)		Almost entirely fat	0.46 (0.39, 0.54)	0.62 (0.38, 1.03)	0.56 (0.24, 1.29)	0.34 (0.19, 0.59)
	Scattered fibroglandular densities	1 (referent)	1 (referent)	1 (referent)	1 (referent)		Scattered fibroglandular densities	1 (referent)	1 (referent)	1 (referent)	1 (referent)		Scattered fibroglandular densities	1 (referent)	1 (referent)	1 (referent)	1 (referent)		Scattered fibroglandular densities	1 (referent)	1 (referent)	1 (referent)	1 (referent)		Scattered fibroglandular densities	1 (referent)	1 (referent)	1 (referent)	1 (referent)
	Heterogeneously dense	1.66 (1.58, 1.75)	1.47 (1.17, 1.84)	1.54 (1.24, 1.91)	1.79 (1.50, 2.13)		Heterogeneously dense	1.61 (1.53, 1.70)	1.30 (1.03, 1.63)	1.51 (1.22, 1.87)	1.75 (1.47, 2.08)		Heterogeneously dense	1.66 (1.58, 1.75)	1.47 (1.17, 1.84)	1.56 (1.26, 1.93)	1.80 (1.51, 2.14)		Heterogeneously dense	1.65 (1.57, 1.74)	1.46 (1.16, 1.84)	1.55 (1.25, 1.92)	1.79 (1.50, 2.13)		Heterogeneously dense	1.60 (1.52, 1.68)	1.29 (1.02, 1.63)	1.49 (1.20, 1.85)	1.73 (1.45, 2.06)
	Extremely dense	2.06 (1.93, 2.21)	2.05 (1.45, 2.90)	1.76 (1.40, 2.22)	2.39 (1.91, 3.01)		Extremely dense	1.95 (1.82, 2.09)	1.72 (1.21, 2.44)	1.72 (1.37, 2.17)	2.29 (1.82, 2.88)		Extremely dense	2.08 (1.95, 2.23)	2.05 (1.45, 2.90)	1.82 (1.45, 2.29)	2.47 (1.97, 3.09)		Extremely dense	2.05 (1.91, 2.19)	2.01 (1.42, 2.85)	1.80 (1.43, 2.27)	2.45 (1.95, 3.07)		Extremely dense	1.91 (1.79, 2.05)	1.71 (1.20, 2.43)	1.66 (1.32, 2.10)	2.23 (1.77, 2.80)
	Postmenopausal						Postmenopausal						Postmenopausal						Postmenopausal						Postmenopausal
	Body Mass Index (kg/m2)						Body Mass Index (kg/m2)						Body Mass Index (kg/m2)						Body Mass Index (kg/m2)						Body Mass Index (kg/m2)
	Underweight (<18.5)	0.77 (0.68, 0.88)	0.56 (0.24, 1.32)	0.66 (0.48, 0.93)	0.57 (0.29, 1.13)		Underweight (<18.5)	0.78 (0.69, 0.89)	0.58 (0.24, 1.39)	0.67 (0.48, 0.94)	0.59 (0.30, 1.17)		Underweight (<18.5)	0.77 (0.68, 0.88)	0.56 (0.24, 1.31)	0.68 (0.48, 0.94)	0.58 (0.29, 1.16)		Underweight (<18.5)	0.77 (0.68, 0.88)	0.55 (0.23, 1.31)	0.68 (0.49, 0.94)	0.58 (0.29, 1.16)		Underweight (<18.5)	0.79 (0.69, 0.90)	0.60 (0.25, 1.44)	0.67 (0.48, 0.93)	0.60 (0.30, 1.19)
	Normal (18.5-24.9)	1 (referent)	1 (referent)	1 (referent)	1 (referent)		Normal (18.5-24.9)	1 (referent)	1 (referent)	1 (referent)	1 (referent)		Normal (18.5-24.9)	1 (referent)	1 (referent)	1 (referent)	1 (referent)		Normal (18.5-24.9)	1 (referent)	1 (referent)	1 (referent)	1 (referent)		Normal (18.5-24.9)	1 (referent)	1 (referent)	1 (referent)	1 (referent)
	Overweight (25.0-29.9)	1.25 (1.21, 1.29)	1.25 (1.05, 1.48)	1.45 (1.29, 1.63)	1.13 (0.99, 1.28)		Overweight (25.0-29.9)	1.25 (1.21, 1.29)	1.19 (1.01, 1.41)	1.45 (1.29, 1.62)	1.12 (0.99, 1.27)		Overweight (25.0-29.9)	1.26 (1.22, 1.30)	1.25 (1.05, 1.48)	1.44 (1.29, 1.62)	1.13 (1.00, 1.28)		Overweight (25.0-29.9)	1.25 (1.21, 1.29)	1.24 (1.05, 1.47)	1.44 (1.28, 1.62)	1.12 (0.99, 1.27)		Overweight (25.0-29.9)	1.26 (1.22, 1.30)	1.18 (1.00, 1.40)	1.44 (1.28, 1.62)	1.13 (1.00, 1.28)
	Obese I (30.0-34.9)	1.40 (1.35, 1.45)	1.55 (1.31, 1.85)	1.48 (1.21, 1.82)	1.32 (1.14, 1.52)		Obese I (30.0-34.9)	1.39 (1.34, 1.44)	1.48 (1.24, 1.76)	1.49 (1.21, 1.82)	1.31 (1.14, 1.51)		Obese I (30.0-34.9)	1.41 (1.36, 1.46)	1.56 (1.31, 1.86)	1.51 (1.24, 1.85)	1.33 (1.15, 1.53)		Obese I (30.0-34.9)	1.39 (1.34, 1.45)	1.54 (1.30, 1.84)	1.48 (1.21, 1.82)	1.31 (1.13, 1.51)		Obese I (30.0-34.9)	1.41 (1.36, 1.46)	1.46 (1.23, 1.74)	1.45 (1.18, 1.78)	1.33 (1.16, 1.54)
	Obese II/III (≥35.0)	1.42 (1.36, 1.49)	1.75 (1.47, 2.09)	2.14 (1.55, 2.95)	1.39 (1.15, 1.68)		Obese II/III (≥35.0)	1.41 (1.35, 1.48)	1.64 (1.37, 1.96)	2.17 (1.57, 2.99)	1.37 (1.13, 1.65)		Obese II/III (≥35.0)	1.45 (1.38, 1.51)	1.77 (1.48, 2.11)	2.20 (1.59, 3.03)	1.40 (1.16, 1.70)		Obese II/III (≥35.0)	1.41 (1.35, 1.48)	1.74 (1.46, 2.08)	2.17 (1.57, 2.99)	1.37 (1.13, 1.66)		Obese II/III (≥35.0)	1.45 (1.38, 1.52)	1.63 (1.37, 1.95)	2.04 (1.48, 2.81)	1.41 (1.16, 1.70)
	BI-RADS Breast Density						BI-RADS Breast Density						BI-RADS Breast Density						BI-RADS Breast Density						BI-RADS Breast Density
	Almost entirely fat	0.56 (0.53, 0.59)	0.65 (0.53, 0.80)	0.62 (0.49, 0.79)	0.54 (0.45, 0.64)		Almost entirely fat	0.57 (0.54, 0.60)	0.75 (0.61, 0.92)	0.63 (0.49, 0.80)	0.56 (0.47, 0.67)		Almost entirely fat	0.57 (0.54, 0.60)	0.66 (0.54, 0.80)	0.61 (0.48, 0.78)	0.55 (0.46, 0.65)		Almost entirely fat	0.56 (0.53, 0.59)	0.66 (0.54, 0.80)	0.61 (0.48, 0.78)	0.54 (0.45, 0.65)		Almost entirely fat	0.59 (0.56, 0.62)	0.75 (0.61, 0.92)	0.66 (0.52, 0.83)	0.57 (0.47, 0.68)
	Scattered fibroglandular densities	1 (referent)	1 (referent)	1 (referent)	1 (referent)		Scattered fibroglandular densities	1 (referent)	1 (referent)	1 (referent)	1 (referent)		Scattered fibroglandular densities	1 (referent)	1 (referent)	1 (referent)	1 (referent)		Scattered fibroglandular densities	1 (referent)	1 (referent)	1 (referent)	1 (referent)		Scattered fibroglandular densities	1 (referent)	1 (referent)	1 (referent)	1 (referent)
	Heterogeneously dense	1.39 (1.35, 1.43)	1.59 (1.42, 1.78)	1.21 (1.07, 1.36)	1.33 (1.19, 1.50)		Heterogeneously dense	1.35 (1.31, 1.39)	1.43 (1.28, 1.60)	1.23 (1.09, 1.38)	1.30 (1.16, 1.47)		Heterogeneously dense	1.38 (1.34, 1.42)	1.58 (1.41, 1.77)	1.25 (1.11, 1.40)	1.34 (1.20, 1.51)		Heterogeneously dense	1.39 (1.35, 1.43)	1.58 (1.41, 1.77)	1.25 (1.11, 1.41)	1.36 (1.21, 1.53)		Heterogeneously dense	1.32 (1.28, 1.36)	1.43 (1.27, 1.60)	1.16 (1.03, 1.31)	1.25 (1.12, 1.41)
	Extremely dense	1.63 (1.54, 1.73)	1.72 (1.26, 2.37)	1.39 (1.15, 1.67)	2.01 (1.63, 2.49)		Extremely dense	1.55 (1.46, 1.64)	1.49 (1.09, 2.05)	1.45 (1.21, 1.73)	1.93 (1.57, 2.38)		Extremely dense	1.61 (1.52, 1.71)	1.68 (1.23, 2.30)	1.48 (1.23, 1.77)	2.04 (1.66, 2.52)		Extremely dense	1.63 (1.54, 1.73)	1.68 (1.22, 2.30)	1.49 (1.24, 1.78)	2.08 (1.69, 2.57)		Extremely dense	1.50 (1.41, 1.59)	1.51 (1.10, 2.07)	1.31 (1.09, 1.57)	1.83 (1.48, 2.26)
	a All models adjust for age, BMI, and BI-RADS breast density.						a All models adjust for age, BMI, and BI-RADS breast density.						a All models adjust for age, BMI, and BI-RADS breast density.						a All models adjust for age, BMI, and BI-RADS breast density.						a All models adjust for age, BMI, and BI-RADS breast density.
	Abbreviations: kg, kilograms; m, meters; BI-RADS, Breast Imaging Reporting and Data System.						Abbreviations: kg, kilograms; m, meters; BI-RADS, Breast Imaging Reporting and Data System.						Abbreviations: kg, kilograms; m, meters; BI-RADS, Breast Imaging Reporting and Data System.						Abbreviations: kg, kilograms; m, meters; BI-RADS, Breast Imaging Reporting and Data System.						Abbreviations: kg, kilograms; m, meters; BI-RADS, Breast Imaging Reporting and Data System.
